# Supplementary material for: Gastrointestinal Tolerance and Protein Absorption Markers with a New Peptide Enteral Formula Compared to a Standard Intact Protein Enteral Formula in Critically Ill Patients
Source: MDPI journal article supplement (doi:10.3390/nu13072362), 2021-07-10
Supplement: s1 [file s1]

Table S1

In- and exclusion criteria

**Inclusion criteria**

1. Age  $\geq$  18 years
2. Admitted to the ICU
3. Expected to require enteral feeding with the study product on the ICU for at least 5 days
4. Aim to reach nutritional target by study product within 3 days
5. Start of study product administration within 48 hours after ICU admission
6. Written informed consent of subject or legal representative

**Exclusion criteria**

1. Requiring other tube feed for medical reason
2. Having any contraindication to receive tube feed such as severe shock, presence of partial or complete mechanical bowel obstruction, intestinal ischemia or intestinal infarction
3. Known history of allergy or intolerance to the study product components (test or control product), such as allergy for cow's milk protein, soy or pea protein, and patients with galactosemia
4. Abnormalities in gastrointestinal tract which may impact gastrointestinal function, e.g. short bowel syndrome - defined as entire length of small bowel totaling 200 cm or less, ulcerative colitis or Crohn's disease, or any form of enterostomy
5. Known chronic severe renal failure
6. Known chronic severe hepatic failure
7. Gastrointestinal tract, abdominal, or bariatric surgery within 72 hours before starting intake of study product or expected in the next 5 days after starting study product intake
8. History of chronic pancreatitis or acute pancreatitis
9. SOFA score  $>12$  from admission to the ICU until 24 hours after admission or until randomization in case of randomization before 24 hours after admission
10. Being pregnant
11. Participating in another clinical intervention trial



Table S2

Study product composition

|              | SF         |             | PF                       |             |
|--------------|------------|-------------|--------------------------|-------------|
|              | Per 100 ml | % of energy | Per 100 ml               | % of energy |
| Energy       | 150 kcal   |             | 150 kcal                 |             |
| Protein      | 7.5 g      | 20%         | 7.5 g                    | 20%         |
| -whey        | 2.6 g      |             | 7.5 g (whey hydrolysate) |             |
| -casein      | 1.9 g      |             |                          |             |
| -pea         | 1.5 g      |             |                          |             |
| -soy         | 1.5 g      |             |                          |             |
| Carbohydrate | 16.9 g     | 45%         | 19.0 g                   | 51%         |
| Fat          | 6.8 g      | 35%         | 4.9 g                    | 29%         |
| -MCT         | 0.9 g      |             | 3.3 g                    |             |
| Fibre        | -          | -           | -                        | -           |



Table S3a

Individual data listing of subjects with at least one adverse event - Peptide Formula

| Subject ID | Verbatim                                                       | Preferred term                      | Product start date<br>[yyyy-mm-dd] | AE start date<br>[yyyy-mm-dd] | AE end date<br>[yyyy-mm-dd] | Duration of AE <sup>1</sup> | Severity | Relationship to study product | SAE?<br>[Yes/No] |
|------------|----------------------------------------------------------------|-------------------------------------|------------------------------------|-------------------------------|-----------------------------|-----------------------------|----------|-------------------------------|------------------|
| GB-301-003 | Diarrhoea                                                      | Diarrhoea                           | 2017-01-26                         | 2017-01-31                    | Ongoing                     |                             | MILD     | POSSIBLY                      | No               |
| GB-301-005 | Ischaemic Bowel (Pneumatosis Intestinalis)                     | Intestinal ischaemia                | 2017-02-10                         | 2017-02-21                    | 2017-03-01                  | 9                           | SEVERE   | UNLIKELY                      | Yes              |
| GB-301-011 | Septic shock with multi-organ failure                          | Septic shock                        | 2017-05-27                         | 2017-06-15                    | 2017-06-15                  | 1                           | SEVERE   | UNLIKELY                      | Yes              |
|            | Septic shock with multi-organ failure                          | Multiple organ dysfunction syndrome | 2017-05-27                         | 2017-06-15                    | 2017-06-15                  | 1                           | SEVERE   | UNLIKELY                      | Yes              |
| GB-301-014 | high gastric residual volume (1X 380 ml, 1X 540 ml, 1X 210 ml) | Gastric residual assessment         | 2017-07-05                         | 2017-07-09                    | 2017-07-09                  | 1                           | MILD     | UNLIKELY                      | No               |
|            | Multi-organ failure                                            | Multiple organ dysfunction syndrome | 2017-07-05                         | 2017-07-15                    | 2017-07-15                  | 1                           | SEVERE   | UNLIKELY                      | Yes              |
| GB-302-001 | Multi organ failure                                            | Multiple organ dysfunction syndrome | 2016-12-21                         | 2016-12-23                    | 2016-12-27                  | 5                           | SEVERE   | NOT RELATED                   | Yes              |
| GB-302-004 | Very severe global hypoxic encephalopathy                      | Hypoxic-ischaemic encephalopathy    | 2017-03-23                         | 2017-04-04                    | 2017-04-04                  | 1                           | SEVERE   | NOT RELATED                   | Yes              |



Table S3b

Individual data listing of subjects with at least one adverse event - Standard Formula

| Subject ID | Verbatim                                                                       | PT                                  | Product start date | AE start date | AE end date | Duration of AE <sup>1</sup> | Severity | Relationship to study product | SAE? [Yes/No] |
|------------|--------------------------------------------------------------------------------|-------------------------------------|--------------------|---------------|-------------|-----------------------------|----------|-------------------------------|---------------|
| GB-301-001 | 100 ml vomiting                                                                | Vomiting                            | 2016-12-08         | 2016-12-17    | 2016-12-17  | 1                           | MILD     | PROBABLY                      | No            |
|            | Sepsis                                                                         | Sepsis                              | 2016-12-08         | 2016-12-22    | 2016-12-23  | 2                           | SEVERE   | UNLIKELY                      | Yes           |
|            | Bowel ischaemia, which was triggered by Granulomatosis with polyangiitis       | Intestinal ischaemia                | 2016-12-08         | 2016-12-22    | Ongoing     |                             | SEVERE   | UNLIKELY                      | Yes           |
| GB-301-010 | Acute Myocardial Infraction                                                    | Acute myocardial infarction         | 2017-04-06         | 2017-04-08    | Ongoing     |                             | SEVERE   | NOT RELATED                   | Yes           |
|            | Cardiogenic shock (as a result of                                              | Cardiogenic shock                   | 2017-04-06         | 2017-04-08    | 2017-04-08  | 1                           | SEVERE   | NOT RELATED                   | Yes           |
| GB-302-003 | Multi-organ failure                                                            | Multiple organ dysfunction syndrome | 2017-01-25         | 2017-02-01    | 2017-02-01  | 1                           | SEVERE   | NOT RELATED                   | Yes           |
| GB-302-007 | Gut ischaemia,                                                                 | Intestinal ischaemia                | 2017-04-27         | 2017-05-05    | Ongoing     |                             | SEVERE   | UNLIKELY                      | Yes           |
|            | Multi-organ failure due to prosthetic valve endocarditis (operated on 25/4/17) | Multiple organ dysfunction syndrome | 2017-04-27         | 2017-05-05    | 2017-05-06  | 2                           | SEVERE   | NOT RELATED                   | Yes           |
|            | Cardiac tamponade                                                              | Cardiac tamponade                   | 2017-04-27         | 2017-04-28    | 2017-04-28  | 1                           | SEVERE   | NOT RELATED                   | Yes           |



Table S4

Number of patients that did not reach target volume tube feed including reason for each single day

|                                                    | <i>Total</i><br>( <i>N</i> = 26) | <i>PF</i><br>( <i>N</i> = 13) | <i>SF</i><br>( <i>N</i> = 13) |
|----------------------------------------------------|----------------------------------|-------------------------------|-------------------------------|
| Day 1: n (%) <sup>1</sup>                          | 26 (100.0%)                      | 13 (100.0%)                   | 13 (100.0%)                   |
| No study product administered, n (%) <sup>2</sup>  | 0 (0.0%)                         | 0 (0.0%)                      | 0 (0.0%)                      |
| Start-up period, n (%) <sup>2</sup>                | 25 (96.2%)                       | 13 (100.0%)                   | 12 (92.3%)                    |
| Symptoms of intolerance, n (%) <sup>2</sup>        | 0 (0.0%)                         | 0 (0.0%)                      | 0 (0.0%)                      |
| Medical investigation, n (%) <sup>2</sup>          | 0 (0.0%)                         | 0 (0.0%)                      | 0 (0.0%)                      |
| Energy intake via other routes, n (%) <sup>2</sup> | 2 (7.7%)                         | 1 (7.7%)                      | 1 (7.7%)                      |
| Other, n (%) <sup>2</sup>                          | 1 (3.8%)                         | 0 (0.0%)                      | 1 (7.7%)                      |
| Day 2: n (%) <sup>1</sup>                          | 22 (84.6%)                       | 12 (92.3%)                    | 10 (76.9%)                    |
| No study product administered, n (%) <sup>2</sup>  | 0 (0.0%)                         | 0 (0.0%)                      | 0 (0.0%)                      |
| Start-up period, n (%) <sup>2</sup>                | 3 (13.6%)                        | 1 (8.3%)                      | 2 (20.0%)                     |
| Symptoms of intolerance, n (%) <sup>2</sup>        | 1 (4.5%)                         | 1 (8.3%)                      | 0 (0.0%)                      |
| Medical investigation, n (%) <sup>2</sup>          | 5 (22.7%)                        | 3 (25.0%)                     | 2 (20.0%)                     |
| Energy intake via other routes, n (%) <sup>2</sup> | 1 (4.5%)                         | 1 (8.3%)                      | 0 (0.0%)                      |
| Other, n (%) <sup>2</sup>                          | 13 (59.1%)                       | 7 (58.3%)                     | 6 (60.0%)                     |
| Day 3: n (%) <sup>1</sup>                          | 19 (73.1%)                       | 10 (76.9%)                    | 9 (69.2%)                     |
| No study product administered, n (%) <sup>2</sup>  | 0 (0.0%)                         | 0 (0.0%)                      | 0 (0.0%)                      |
| Start-up period, n (%) <sup>2</sup>                | 0 (0.0%)                         | 0 (0.0%)                      | 0 (0.0%)                      |
| Symptoms of intolerance, n (%) <sup>2</sup>        | 2 (10.5%)                        | 1 (10.0%)                     | 1 (11.1%)                     |
| Medical investigation, n (%) <sup>2</sup>          | 4 (21.1%)                        | 3 (30.0%)                     | 1 (11.1%)                     |
| Energy intake via other routes, n (%) <sup>2</sup> | 3 (15.8%)                        | 3 (30.0%)                     | 0 (0.0%)                      |
| Other, n (%) <sup>2</sup>                          | 13 (68.4%)                       | 5 (50.0%)                     | 8 (88.9%)                     |
| Day 4: n (%) <sup>1</sup>                          | 19 (73.1%)                       | 10 (76.9%)                    | 9 (69.2%)                     |
| No study product administered, n (%) <sup>2</sup>  | 0 (0.0%)                         | 0 (0.0%)                      | 0 (0.0%)                      |
| Start-up period, n (%) <sup>2</sup>                | 0 (0.0%)                         | 0 (0.0%)                      | 0 (0.0%)                      |
| Symptoms of intolerance, n (%) <sup>2</sup>        | 3 (15.8%)                        | 2 (20.0%)                     | 1 (11.1%)                     |
| Medical investigation, n (%) <sup>2</sup>          | 3 (15.8%)                        | 2 (20.0%)                     | 1 (11.1%)                     |
| Energy intake via other routes, n (%) <sup>2</sup> | 4 (21.1%)                        | 3 (30.0%)                     | 1 (11.1%)                     |
| Other, n (%) <sup>2</sup>                          | 13 (68.4%)                       | 6 (60.0%)                     | 7 (77.8%)                     |
| Day 5: n (%) <sup>1</sup>                          | 20 (76.9%)                       | 10 (76.9%)                    | 10 (76.9%)                    |
| No study product administered, n (%) <sup>2</sup>  | 0 (0.0%)                         | 0 (0.0%)                      | 0 (0.0%)                      |
| Start-up period, n (%) <sup>2</sup>                | 1 (5.0%)                         | 1 (10.0%)                     | 0 (0.0%)                      |
| Symptoms of intolerance, n (%) <sup>2</sup>        | 3 (15.0%)                        | 2 (20.0%)                     | 1 (10.0%)                     |
| Medical investigation, n (%) <sup>2</sup>          | 3 (15.0%)                        | 1 (10.0%)                     | 2 (20.0%)                     |
| Energy intake via other routes, n (%) <sup>2</sup> | 3 (15.0%)                        | 2 (20.0%)                     | 1 (10.0%)                     |
| Other, n (%) <sup>2</sup>                          | 12 (60.0%)                       | 6 (60.0%)                     | 6 (60.0%)                     |



|                                                    | <i>Total</i><br>( <i>N</i> = 26) | <i>PF</i><br>( <i>N</i> = 13) | <i>SF</i><br>( <i>N</i> = 13) |
|----------------------------------------------------|----------------------------------|-------------------------------|-------------------------------|
| Day 6: n (%) <sup>1</sup>                          | 17 (65.4%)                       | 8 (61.5%)                     | 9 (69.2%)                     |
| No study product administered, n (%) <sup>2</sup>  | 1 (5.9%)                         | 1 (12.5%)                     | 0 (0.0%)                      |
| Start-up period, n (%) <sup>2</sup>                | 0 (0.0%)                         | 0 (0.0%)                      | 0 (0.0%)                      |
| Symptoms of intolerance, n (%) <sup>2</sup>        | 2 (11.8%)                        | 1 (12.5%)                     | 1 (11.1%)                     |
| Medical investigation, n (%) <sup>2</sup>          | 3 (17.6%)                        | 1 (12.5%)                     | 2 (22.2%)                     |
| Energy intake via other routes, n (%) <sup>2</sup> | 2 (11.8%)                        | 1 (12.5%)                     | 1 (11.1%)                     |
| Other, n (%) <sup>2</sup>                          | 10 (58.8%)                       | 4 (50.0%)                     | 6 (66.7%)                     |
| Day 7: n (%) <sup>1</sup>                          | 15 (57.7%)                       | 7 (53.8%)                     | 8 (61.5%)                     |
| No study product administered, n (%) <sup>2</sup>  | 0 (0.0%)                         | 0 (0.0%)                      | 0 (0.0%)                      |
| Start-up period, n (%) <sup>2</sup>                | 0 (0.0%)                         | 0 (0.0%)                      | 0 (0.0%)                      |
| Symptoms of intolerance, n (%) <sup>2</sup>        | 0 (0.0%)                         | 0 (0.0%)                      | 0 (0.0%)                      |
| Medical investigation, n (%) <sup>2</sup>          | 1 (6.7%)                         | 0 (0.0%)                      | 1 (12.5%)                     |
| Energy intake via other routes, n (%) <sup>2</sup> | 2 (13.3%)                        | 0 (0.0%)                      | 2 (25.0%)                     |
| Other, n (%) <sup>2</sup>                          | 13 (86.7%)                       | 7 (100.0%)                    | 6 (75.0%)                     |
| Day 8: n (%) <sup>1</sup>                          | 14 (53.8%)                       | 5 (38.5%)                     | 9 (69.2%)                     |
| No study product administered, n (%) <sup>2</sup>  | 0 (0.0%)                         | 0 (0.0%)                      | 0 (0.0%)                      |
| Start-up period, n (%) <sup>2</sup>                | 0 (0.0%)                         | 0 (0.0%)                      | 0 (0.0%)                      |
| Symptoms of intolerance, n (%) <sup>2</sup>        | 2 (14.3%)                        | 1 (20.0%)                     | 1 (11.1%)                     |
| Medical investigation, n (%) <sup>2</sup>          | 2 (14.3%)                        | 0 (0.0%)                      | 2 (22.2%)                     |
| Energy intake via other routes, n (%) <sup>2</sup> | 2 (14.3%)                        | 1 (20.0%)                     | 1 (11.1%)                     |
| Other, n (%) <sup>2</sup>                          | 12 (85.7%)                       | 5 (100.0%)                    | 7 (77.8%)                     |
| Day 9: n (%) <sup>1</sup>                          | 9 (34.6%)                        | 4 (30.8%)                     | 5 (38.5%)                     |
| No study product administered, n (%) <sup>2</sup>  | 0 (0.0%)                         | 0 (0.0%)                      | 0 (0.0%)                      |
| Start-up period, n (%) <sup>2</sup>                | 1 (11.1%)                        | 1 (25.0%)                     | 0 (0.0%)                      |
| Symptoms of intolerance, n (%) <sup>2</sup>        | 0 (0.0%)                         | 0 (0.0%)                      | 0 (0.0%)                      |
| Medical investigation, n (%) <sup>2</sup>          | 2 (22.2%)                        | 0 (0.0%)                      | 2 (40.0%)                     |
| Energy intake via other routes, n (%) <sup>2</sup> | 1 (11.1%)                        | 1 (25.0%)                     | 0 (0.0%)                      |
| Other, n (%) <sup>2</sup>                          | 7 (77.8%)                        | 4 (100.0%)                    | 3 (60.0%)                     |
| Day 10: n (%) <sup>1</sup>                         | 8 (30.8%)                        | 4 (30.8%)                     | 4 (30.8%)                     |
| No study product administered, n (%) <sup>2</sup>  | 0 (0.0%)                         | 0 (0.0%)                      | 0 (0.0%)                      |
| Start-up period, n (%) <sup>2</sup>                | 0 (0.0%)                         | 0 (0.0%)                      | 0 (0.0%)                      |
| Symptoms of intolerance, n (%) <sup>2</sup>        | 1 (12.5%)                        | 0 (0.0%)                      | 1 (25.0%)                     |
| Medical investigation, n (%) <sup>2</sup>          | 0 (0.0%)                         | 0 (0.0%)                      | 0 (0.0%)                      |
| Energy intake via other routes, n (%) <sup>2</sup> | 1 (12.5%)                        | 1 (25.0%)                     | 0 (0.0%)                      |
| Other, n (%) <sup>2</sup>                          | 7 (87.5%)                        | 4 (100.0%)                    | 3 (75.0%)                     |
| Day 11: n (%) <sup>1</sup>                         | 9 (34.6%)                        | 4 (30.8%)                     | 5 (38.5%)                     |
| No study product administered, n (%) <sup>2</sup>  | 0 (0.0%)                         | 0 (0.0%)                      | 0 (0.0%)                      |



|                                                    | <i>Total</i><br>(N = 26) | <i>PF</i><br>(N = 13) | <i>SF</i><br>(N = 13) |
|----------------------------------------------------|--------------------------|-----------------------|-----------------------|
| Start-up period, n (%) <sup>2</sup>                | 0 (0.0%)                 | 0 (0.0%)              | 0 (0.0%)              |
| Symptoms of intolerance, n (%) <sup>2</sup>        | 1 (11.1%)                | 0 (0.0%)              | 1 (20.0%)             |
| Medical investigation, n (%) <sup>2</sup>          | 0 (0.0%)                 | 0 (0.0%)              | 0 (0.0%)              |
| Energy intake via other routes, n (%) <sup>2</sup> | 1 (11.1%)                | 1 (25.0%)             | 0 (0.0%)              |
| Other, n (%) <sup>2</sup>                          | 8 (88.9%)                | 4 (100.0%)            | 4 (80.0%)             |
| Day 12: n (%) <sup>1</sup>                         | 8 (30.8%)                | 4 (30.8%)             | 4 (30.8%)             |
| No study product administered, n (%) <sup>2</sup>  | 0 (0.0%)                 | 0 (0.0%)              | 0 (0.0%)              |
| Start-up period, n (%) <sup>2</sup>                | 0 (0.0%)                 | 0 (0.0%)              | 0 (0.0%)              |
| Symptoms of intolerance, n (%) <sup>2</sup>        | 3 (37.5%)                | 2 (50.0%)             | 1 (25.0%)             |
| Medical investigation, n (%) <sup>2</sup>          | 2 (25.0%)                | 1 (25.0%)             | 1 (25.0%)             |
| Energy intake via other routes, n (%) <sup>2</sup> | 1 (12.5%)                | 1 (25.0%)             | 0 (0.0%)              |
| Other, n (%) <sup>2</sup>                          | 5 (62.5%)                | 3 (75.0%)             | 2 (50.0%)             |
| Day 13: n (%) <sup>1</sup>                         | 7 (26.9%)                | 3 (23.1%)             | 4 (30.8%)             |
| No study product administered, n (%) <sup>2</sup>  | 0 (0.0%)                 | 0 (0.0%)              | 0 (0.0%)              |
| Start-up period, n (%) <sup>2</sup>                | 0 (0.0%)                 | 0 (0.0%)              | 0 (0.0%)              |
| Symptoms of intolerance, n (%) <sup>2</sup>        | 0 (0.0%)                 | 0 (0.0%)              | 0 (0.0%)              |
| Medical investigation, n (%) <sup>2</sup>          | 0 (0.0%)                 | 0 (0.0%)              | 0 (0.0%)              |
| Energy intake via other routes, n (%) <sup>2</sup> | 1 (14.3%)                | 1 (33.3%)             | 0 (0.0%)              |
| Other, n (%) <sup>2</sup>                          | 7 (100.0%)               | 3 (100.0%)            | 4 (100.0%)            |
| Day 14: n (%) <sup>1</sup>                         | 7 (26.9%)                | 2 (15.4%)             | 5 (38.5%)             |
| No study product administered, n (%) <sup>2</sup>  | 0 (0.0%)                 | 0 (0.0%)              | 0 (0.0%)              |
| Start-up period, n (%) <sup>2</sup>                | 0 (0.0%)                 | 0 (0.0%)              | 0 (0.0%)              |
| Symptoms of intolerance, n (%) <sup>2</sup>        | 0 (0.0%)                 | 0 (0.0%)              | 0 (0.0%)              |
| Medical investigation, n (%) <sup>2</sup>          | 0 (0.0%)                 | 0 (0.0%)              | 0 (0.0%)              |
| Energy intake via other routes, n (%) <sup>2</sup> | 4 (57.1%)                | 1 (50.0%)             | 3 (60.0%)             |
| Other, n (%) <sup>2</sup>                          | 5 (71.4%)                | 2 (100.0%)            | 3 (60.0%)             |



Table S5

Summary statistics for ASAT (U/L) day 5

|                                                                     |         | <i>Statistic</i>        | <i>Total<br/>(N = 26)</i> | <i>New peptide<br/>formula<br/>(N = 13)</i> | <i>Standard<br/>formula<br/>(N = 13)</i> | <i>P-<br/>value<sup>1</sup></i> |
|---------------------------------------------------------------------|---------|-------------------------|---------------------------|---------------------------------------------|------------------------------------------|---------------------------------|
| Number of subjects (N)                                              |         | n                       | 24                        | 12                                          | 12                                       |                                 |
| ASAT (U/L), outside normal range                                    | No      | n (%)                   | 10 (47.6%)                | 5 (45.5%)                                   | 5 (50.0%)                                |                                 |
|                                                                     | Yes     | n (%)                   | 11 (52.4%)                | 6 (54.5%)                                   | 5 (50.0%)                                |                                 |
|                                                                     | Missing | n                       | 3                         | 1                                           | 2                                        |                                 |
| ASAT (U/L), if outside normal range, clinically relevant            | No      | n (%)                   | 0 (0.0%)                  | 0 (0.0%)                                    | 0 (0.0%)                                 |                                 |
|                                                                     | Yes     | n (%)                   | 11 (100.0%)               | 6 (100.0%)                                  | 5 (100.0%)                               |                                 |
| ASAT (U/L), if clinically relevant, related to underlying condition | No      | n (%)                   | 0 (0.0%)                  | 0 (0.0%)                                    | 0 (0.0%)                                 |                                 |
|                                                                     | Yes     | n (%)                   | 11 (100.0%)               | 6 (100.0%)                                  | 5 (100.0%)                               |                                 |
| ASAT (U/L)                                                          |         | n (Nmiss)               | 21 (3)                    | 11 (1)                                      | 10 (2)                                   |                                 |
|                                                                     |         | Mean (SD)               | 65.0 (51.1)               | 79.6 (64.6)                                 | 48.9 (24.9)                              |                                 |
|                                                                     |         | Median (Q1-Q3)          | 43 (33-86)                | 55 (33-126)                                 | 42 (29-71)                               | 0.364                           |
|                                                                     |         | Min-Max                 | 20-221                    | 20-221                                      | 22-91                                    |                                 |
|                                                                     |         | 95% confidence interval | 41.7-88.3                 | 36.2-123.1                                  | 31.1-66.7                                |                                 |

(N): Number of subjects of the analysis population.

<sup>1</sup>P-value is based on a stratified Mann-Whitney test (van Elteren test) with site as stratification factor.

Table S6 Number of patients (n) per intervention day

| <i>Day</i> | <i>PF<br/>(n)</i> | <i>SF<br/>(n)</i> |
|------------|-------------------|-------------------|
| 1          | 13                | 13                |
| 2          | 13                | 13                |
| 3          | 13                | 13                |
| 4          | 12                | 12                |
| 5          | 10                | 11                |
| 6          | 8                 | 11                |
| 7          | 7                 | 11                |
| 8          | 5                 | 11                |
| 9          | 4                 | 7                 |
| 10         | 4                 | 6                 |
| 11         | 4                 | 6                 |
| 12         | 4                 | 6                 |
| 13         | 3                 | 6                 |
| 14         | 2                 | 6                 |
